# Supplementary material for: Implementing a Personalized Physical Therapy Approach (Coach2Move) Is Effective in Increasing Physical Activity and Improving Functional Mobility in Older Adults: A Cluster-Randomized, Stepped Wedge Trial
Source: PubMed Central journal article supplement (PMC10071485; doi:10.1093/ptj/pzac138), 2022-10-06
Supplement: ptj-2021-0844_r2_suppl_appendix_1_pzac138.pdf [file ptj-2021-0844_r2_suppl_appendix_1_pzac138.pdf]

## Supplementary Appendix 1. Frequencies of used resources.

| <i>Resource use</i>                                  | Usual care PT<br>(n=180)                     |                               | Coach2Move<br>(n=112)                        |                               | Unit cost (€)      |
|------------------------------------------------------|----------------------------------------------|-------------------------------|----------------------------------------------|-------------------------------|--------------------|
|                                                      | Patients that<br>used resource<br>number (%) | Units<br>used<br>mean<br>(SD) | Patients that used<br>resource number<br>(%) | Units<br>used<br>mean<br>(SD) |                    |
| <i>Physical therapy</i>                              |                                              | 21.7                          |                                              | 15.4                          | €30.69             |
| <5 sessions                                          | 11 (7.1)                                     | (15.3)                        | 8 (9.8)                                      | (10.3)                        |                    |
| 5-12 sessions                                        | 61 (39.1)                                    |                               | 41 (50.0)                                    |                               |                    |
| 13-18 sessions                                       | 33 (21.2)                                    |                               | 21 (25.6)                                    |                               |                    |
| >18 sessions                                         | 51 (32.7)                                    |                               | 12 (14.6)                                    |                               |                    |
| <i>General practitioner</i>                          |                                              | 5.2                           |                                              | 4.4                           | €37.-              |
| 0 visits                                             | 17 (10.9)                                    | (3.8)                         | 9 (11.0)                                     | (2.5)                         |                    |
| 1 visit                                              | 29 (18.6)                                    |                               | 13 (15.9)                                    |                               |                    |
| 2 visits                                             | 20 (12.8)                                    |                               | 13 (15.9)                                    |                               |                    |
| >2 visits                                            | 90 (57.7)                                    |                               | 47 (57.3)                                    |                               |                    |
| <i>Other allied<br/>healthcare<br/>practitioners</i> | 23 (18.4)                                    | 1.5<br>(4.8)                  | 10 (18.5)                                    | 1.9<br>(4.5)                  | €34.-              |
| <i>Home care</i>                                     |                                              | 81.9<br>(93.3)                |                                              | 41.5<br>(65.6)                |                    |
| <i>Housekeeping</i>                                  | 125 (77.6)                                   |                               | 71 (76.3)                                    |                               | €23.- per<br>hour  |
| <i>Nurse</i>                                         | 65 (40.4)                                    |                               | 40 (43.0)                                    |                               | €56.60<br>per hour |
| <i>Meal service</i>                                  | 45 (28.0)                                    | 46.4<br>(85.8)                | 29 (31.2)                                    | 43.1<br>(87.1)                | 7.50 per<br>meal   |
| <i>Outpatient care</i>                               |                                              | 4.1<br>(18.1)                 |                                              | 5.5<br>(19.2)                 |                    |
| <i>Nursing home<br/>admission</i>                    | 4 (2.5)                                      |                               | 9 (9.7)                                      |                               | €43.40 per<br>day  |

|                                            |           |             |           |                |
|--------------------------------------------|-----------|-------------|-----------|----------------|
| <i>Temporary nursing home</i>              | 1 (0.6)   |             | 1 (1.1)   | €94.- per day  |
| <i>Temporary residential home</i>          |           |             |           | €150.- per day |
| <i>Temporary geriatric rehabilitation</i>  | 3 (1.9)   |             | 1 (1.1)   | €515.- per day |
|                                            | 3 (1.9)   |             | 4 (4.3)   |                |
| <i>Assistive devices</i>                   |           | 0.2 (0.5)   |           | 0.2 (0.5)      |
| <i>Walker</i>                              | 17 (9.4)  |             | 17 (15.2) | €120.-         |
| <i>Crutches</i>                            | 4 (2.2)   |             | 1 (0.9)   | €25.-          |
| <i>Cane</i>                                | 17 (9.4)  |             | 5 (4.5)   | €23.-          |
| <i>Sole enhancement</i>                    | 1 (0.6)   |             | 1 (0.9)   | €50.45         |
| <i>Other</i>                               | 2 (1.1)   |             | 3 (2.7)   | €55.-          |
| <i>People who reported fall incidents:</i> |           | 1.17        |           | 0.45           |
|                                            | 78 (43.3) | (2.59)      | 27 (24.1) | (1.22)         |
| <i>Hospital admissions:</i>                |           |             |           |                |
|                                            | 29 (16.1) | 0.19 (0.51) | 9 (8.0)   | 0.10 (0.35)    |
| <i>Deaths:</i>                             |           |             |           |                |
|                                            | 8 (4.4)   |             | 4 (3.6)   |                |
