# Supplementary material for: Implementing a Personalized Physical Therapy Approach (Coach2Move) Is Effective in Increasing Physical Activity and Improving Functional Mobility in Older Adults: A Cluster-Randomized, Stepped Wedge Trial
Source: PubMed Central journal article supplement (PMC10071485; doi:10.1093/ptj/pzac138), 2022-10-06
Supplement: ptj-2021-0844_r2_suppl_appendix_2_pzac138.pdf [file ptj-2021-0844_r2_suppl_appendix_2_pzac138.pdf]

**Supplementary Appendix 2. Mean costs per patient at each timepoint.**

|                                      |      | <i>Usual care (n=180)</i> | <i>Coach2Move (n=112)</i> |
|--------------------------------------|------|---------------------------|---------------------------|
| <b>Costs medical specialist:</b>     | T1   | 160.8 (182.28)            | 146.59 (135.34)           |
|                                      | T2   | 123.06 (141.41)           | 113.84 (152.72)           |
|                                      | T3   | 133.02 (136.90)           | 103.79 (141.47)           |
| <b>Costs physical therapy:</b>       | T1   | 334.40 (182.08)           | 295.56 (176.37)           |
|                                      | T2 * | 175.14 (225.40)           | 98.45 (161.02)            |
|                                      | T3 * | 143.63 (187.52)           | 80.06 (161.42)            |
| <b>Costs other medical services:</b> | T1   | 49.17 (110.59)            | 56.83 (87.67)             |
|                                      | T2   | 43.43 (96.89)             | 45.13 (94.84)             |
|                                      | T3   | 53.91 (119.02)            | 44.71 (70.54)             |
| <b>Medication costs:</b>             | T1   | 236.83 (330.50)           | 352.88 (1142.27)          |
|                                      | T2   | 238.84 (331.18)           | 396.34 (1218.08)          |
|                                      | T3   | 228.91 (264.34)           | 411.17 (1261.89)          |
| <b>Costs of operations:</b>          | T1 * | 276.12 (1135.85)          | 54.78 (528.33)            |
|                                      | T2   | 114.36 (674.90)           | 118.17 (754.04)           |
|                                      | T3   | 170.16 (933.11)           | 110.66 (836.61)           |
| <b>Costs hospital admissions:</b>    | T1   | 301.86 (1647.71)          | 399.13 (1816.51)          |
|                                      | T2   | 595.38 (3190.37)          | 171.22 (921.26)           |
|                                      | T3   | 370.07 (1527.91)          | 563.48 (2144.82)          |
| <b>Costs emergency ward:</b>         | T1   | 13.70 (73.43)             | 23.97 (83.98)             |
|                                      | T2   | 18.17 (73.68)             | 23.05 (82.54)             |
|                                      | T3   | 17.62 (72.65)             | 34.24 (99.13)             |
| <b>Costs domestic help:</b>          | T1   | 416.43 (340.00)           | 476.25 (314.47)           |
|                                      | T2   | 452.04 (338.60)           | 420.45 (299.95)           |
|                                      | T3 * | 489.75 (331.21)           | 327.47 (277.57)           |
| <b>Costs nursing care:</b>           | T1   | 612.02 (1178.03)          | 737.34 (1171.97)          |
|                                      | T2   | 452.04 (338.60)           | 637.10 (1251.37)          |

|                                       |      |                   |                   |
|---------------------------------------|------|-------------------|-------------------|
|                                       | T3   | 489.75 (331.21)   | 762.44 (1228.38)  |
| <b>Costs daycare:</b>                 | T1   | 85.71 (303.45)    | 70.68 (263.77)    |
|                                       | T2   | 123.25 (360.81)   | 53.51 (242.07)    |
|                                       | T3   | 152.29 (401.26)   | 79.25 (537.51)    |
| <b>Costs meal service:</b>            | T1   | 114.46 (226.49)   | 163.21 (255.01)   |
|                                       | T2   | 132.64 (240.15)   | 163.54 (261.20)   |
|                                       | T3   | 173.18 (262.08)   | 251.60 (293.03)   |
| <b>Costs nursing home:</b>            | T1 * | 204.97 (1518.05)  | 37.50 (359.69)    |
|                                       | T2   | 0                 | 0                 |
|                                       | T3 * | 19.93 (203.94)    | 97.83 (663.49)    |
| <b>Costs rehabilitation center:</b>   | T1 * | 0                 | 576.68 (4147.39)  |
|                                       | T2   | 505.10 (4248.20)  | 527.56 (4777.27)  |
|                                       | T3   | 277.31 (2090.39)  | 548.59 (3720.70)  |
| <b>Costs residential care:</b>        | T1 * | 159.98 (1064.31)  | 522.11 (1866.85)  |
|                                       | T2 * | 166.97 (1075.59)  | 914.60 (2550.55)  |
|                                       | T3 * | 266.22 (1439.00)  | 1195.44 (2911.99) |
| <b>Costs modification to housing:</b> | T1   | 92.98 (398.98)    | 113.55 (388.67)   |
|                                       | T2   | 23.59 (170.23)    | 29.02 (222.98)    |
|                                       | T3   | 119.74 (522.32)   | 51.05 (287.43)    |
| <b>Costs medical devices:</b>         | T1   | 182.23 (478.73)   | 100.27 (390.75)   |
|                                       | T2 * | 175.06 (457.14)   | 48.23 (189.11)    |
|                                       | T3   | 77.00 (319.51)    | 35.39 (142.20)    |
| <b>Costs walking aids:</b>            | T1 * | 2.68 (19.49)      | 12.22 (75.48)     |
|                                       | T2 * | 0                 | 2.16 (2.16)       |
|                                       | T3   | 0                 | 0                 |
| <b>Total costs:</b>                   | T1   | 3247.76 (4209.57) | 4103.30 (6258.43) |
|                                       | T2   | 3712.12 (7619.88) | 3668.20 (6978.19) |
|                                       | T3   | 3458.58 (4602.70) | 3233.18 (6279.43) |

\*An asterisk indicates a statistical significant difference ( $p < 0.05$ ).
