# Supplementary material for: Implementing a Personalized Physical Therapy Approach (Coach2Move) Is Effective in Increasing Physical Activity and Improving Functional Mobility in Older Adults: A Cluster-Randomized, Stepped Wedge Trial
Source: PubMed Central journal article supplement (PMC10071485; doi:10.1093/ptj/pzac138), 2022-10-06
Supplement: ptj-2021-0844_r2_suppl_appendix_3_pzac138.pdf [file ptj-2021-0844_r2_suppl_appendix_3_pzac138.pdf]

### Supplementary Appendix 3. ICC Calculations

|                                                                                                           | Variance elderly | Variance physical therapists | Variance practices | Correlation of elderly within physical therapist | Correlation of physical therapists within practice |
|-----------------------------------------------------------------------------------------------------------|------------------|------------------------------|--------------------|--------------------------------------------------|----------------------------------------------------|
| <i>LAPAQ 6 months</i>                                                                                     | 162964           | 2551                         | 15842              | 0.10                                             | 0.86                                               |
| <i>TUG 6 months</i>                                                                                       | 186              | 0                            | 0                  | 0                                                | Not calculable                                     |
| <i>LAPAQ 3 months</i>                                                                                     | 203014           | 0                            | 22871              | 0.10                                             | 1                                                  |
| <i>TUG 3 months</i>                                                                                       | 115.7            | 0                            | 4.2                | 0.035                                            | 1                                                  |
| <i>LAPAQ 12 months</i>                                                                                    | 276397           | 21277                        | 21735              | 0.13                                             | 0.5                                                |
| <i>TUG 12 months</i>                                                                                      | 405.6            | 0                            | 11.3               | 0.027                                            | 1                                                  |
| <i>LAPAQ = Longitudinal Aging Study Amsterdam Physical Activity Questionnaire; TUG = Timed Up and Go;</i> |                  |                              |                    |                                                  |                                                    |
